# Supplementary material
Source: PubMed Central journal article supplement (PMC4159661)

# Supplemental Figure 2

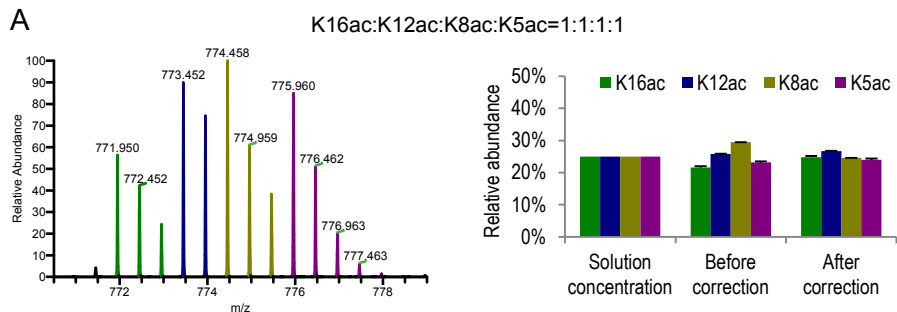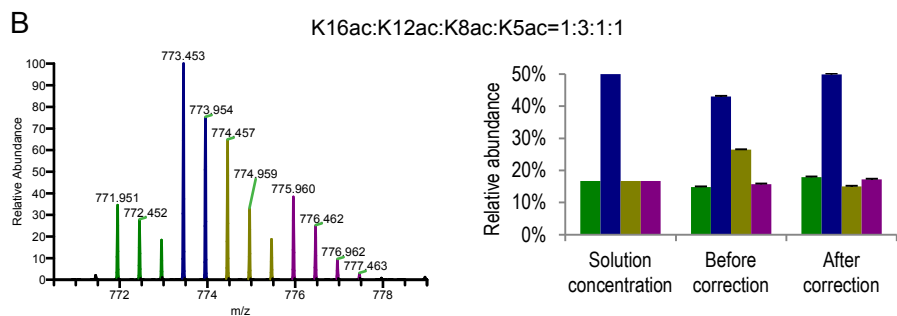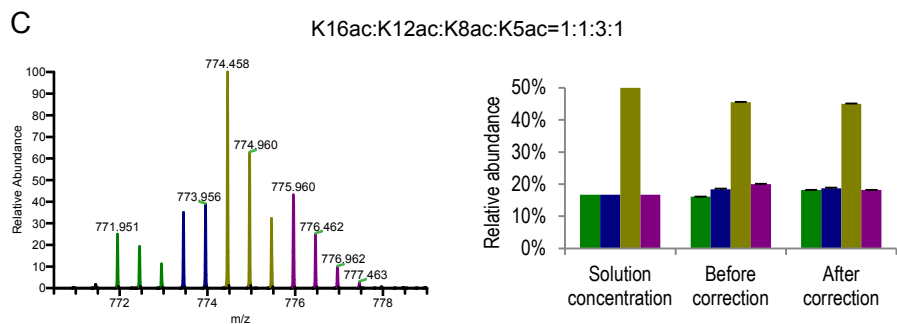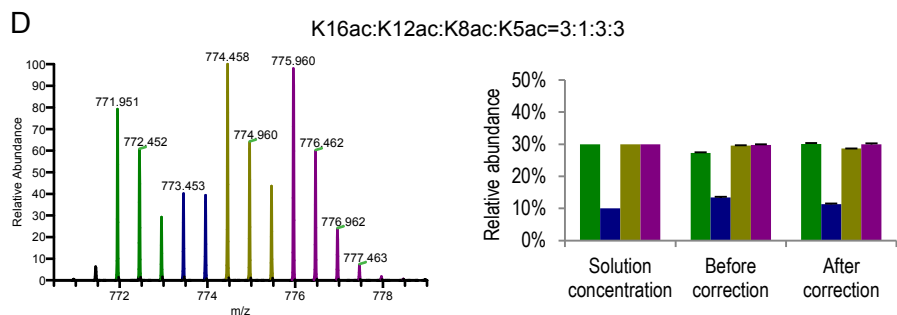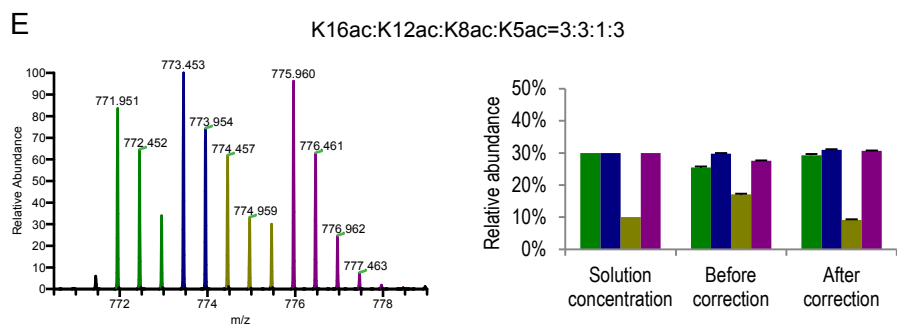

Supplemental Figure 3

A

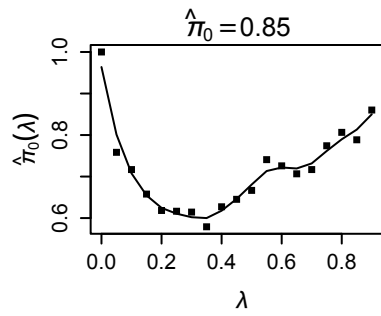

B

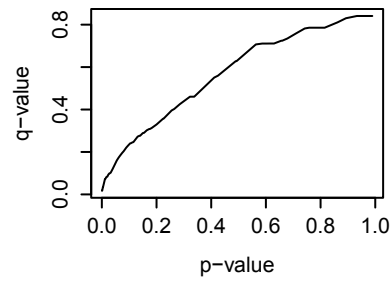

C

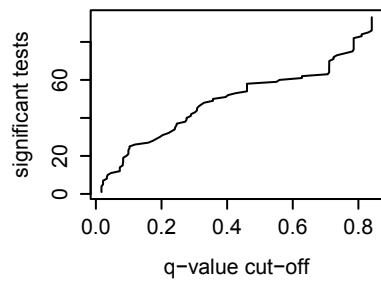

D

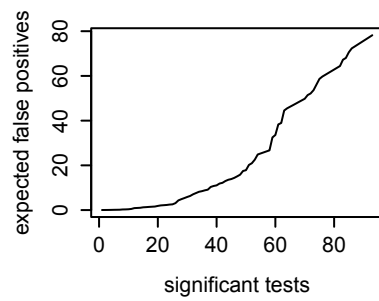

Supplemental Figure 4

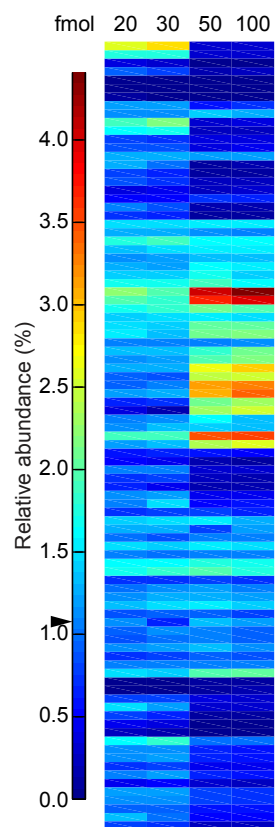

# Supplemental Figure 5

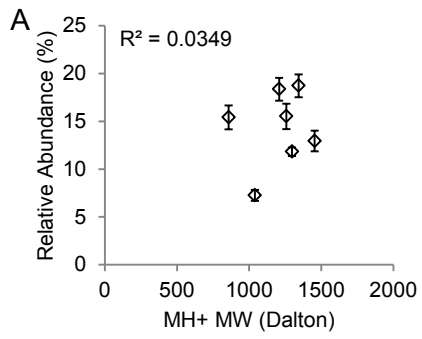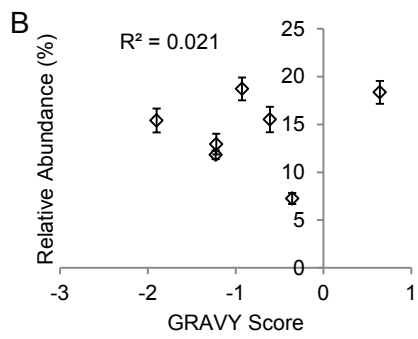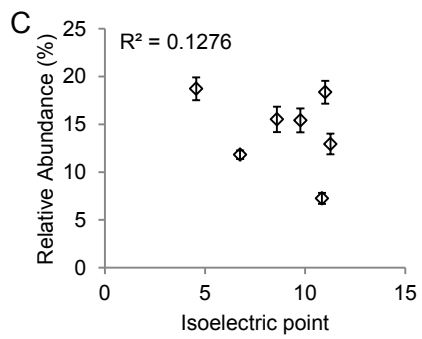

# Supplemental Figure 6

A

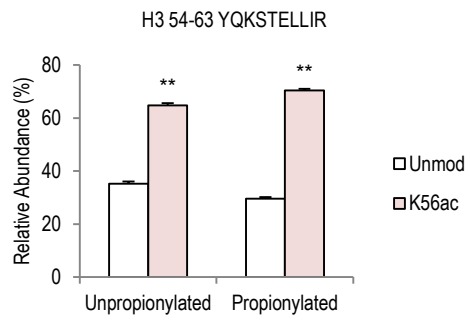

B

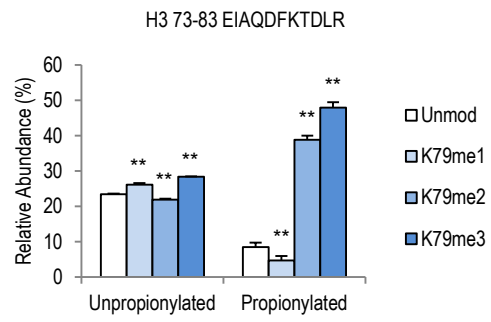

Supplement: supp_O113.036459_mcp.O113.036459-3.pdf [file supp_O113.036459_mcp.O113.036459-3.pdf]
